# Supplementary material
Source: PubMed Central journal article supplement (PMC5344208)
Supplement: cdd2016147x5.pdf [file cdd2016147x5.pdf]

Guide RNA sequences (5'-3'):

| Name of guide RNA    | Target gene/exon         | Sequence             |
|----------------------|--------------------------|----------------------|
| <i>CASPASE-8</i> #1  | <i>CASPASE-8</i> exon 2  | GCCTGGACTACATTCCGCAA |
| <i>CASPASE-8</i> #2  | <i>CASPASE-8</i> exon 7  | CGGGGATACTGTCTGATCAT |
| <i>RIPK1</i> #1      | <i>RIPK1</i> exon 2      | AGTGCAGAACTGGACAGCGG |
| <i>RIPK3</i> #1      | <i>RIPK3</i> exon 3      | GAATTCGTGCTGCGCCTAGA |
| <i>MLKL</i> #1       | <i>MLKL</i> exon 2       | CAAGAAACAGTGCCGGCGCC |
| <i>MLKL</i> #2       | <i>MLKL</i> exon 2       | GGAGCTCTCGCTGTTACTTC |
| <i>CASPASE-10</i> #1 | <i>CASPASE-10</i> exon 4 | AAATGCCAGGAAACTTAGGG |

Primer sequences (5'-3') used for Illumina MiSeq sequencing:

| Name of guide RNA       | Fwd primer sequence           | Rev primer sequence          |
|-------------------------|-------------------------------|------------------------------|
| <i>CASPASE-8</i> #1     | GGACTTCAGCAGAAATCTT<br>TATG   | TAGGCAGAAATTTGAGCCCT<br>GC   |
| <i>CASPASE-8</i> #2     | GAGTCAGCTCCTGGGTTG<br>G       | ACATGGCCCTTTTGGTATAG<br>C    |
| <i>RIPK1</i> #1         | ACAGGGTACAGCTCTGCC<br>GG      | GCAGCAGCCAACGGCTCCAC         |
| <i>RIPK3</i> #1         | CGGTGCGACTCCAGCTCT<br>C       | GTCCCGGTGCAGGAGCAC           |
| <i>MLKL</i> #1          | CATTTAAGTCACAGACCGC<br>TTTG   | CCCATTAGCCTCCTCCAGGG         |
| <i>MLKL</i> #2          | GCAATAGATCCAATATCTG<br>CAGG   | TCATCATTGCTGCTCCTTTGG        |
| <i>CASPASE-10</i><br>#1 | GCTGTTATATCTTATTTATC<br>AGTGC | GCCAATTGGTTTAAGAATTC<br>CATG |

CRISPR/Cas9 HT29 cell clone number used in this study:

*CASP8*<sup>-/-</sup> HT29 clones: 5

```
TACCAAATGAAAAGCAAACCTCGGGCATACTGTCTGATCATCAACAATCAC
TACCAAATGAAAAGCAAACCTCGGG-ATACTGTCTGATCATCAACAATCAC
TACCAAATGAAAAGCAAACCTCGG--ATACTGTCTGATCATCAACAATCAC
```

*RIPK1*<sup>-/-</sup> HT29 clones: 3

```
AGTGACTTCCTGGAGAGTGCAGAACTGGACACCGGAGGCTTTGGGAAGG
AGTGACTTCCTGGAGAGTGCAGAACTGGACA-CGGAGGCTTGGGAAGG
AGTGACTTCCTGGAGAGTGCAGAACTGGACA-----TT-----CAAGG
AGTGACTTCCTGGAGAGTGCAGAACTGGACA-C-----
AGTGACTTCCTGGAGAGTGCAGAAC-----CGGAGGCTTGGGAAGG
```

*RIPK3*<sup>-/-</sup> HT29 clones: 2

```
GCCATGGCAAGTCTGGATAACGAATTCGTGCTGCGCCTAGAAGGGGTTATCGAGAAG
GCCATGGCAAGTCTGGATAA-----GAAGGGGTTATCGAGAAG
GCCATGGCAAGTCTGGATAA-----GAAGGGGTTATCGAGAAG
```

*MLKL*<sup>-/-</sup> HT29 clones: 1 full knockout, 1 with one wt allele

```
TGTCTGGAAGGAGCTCTCGCTGTTACTT-CAGGTTGAGC
TGTCTGGAAGGAGCTCTCGCTGTTA-TT-CAGGTTGAGC
TGTCTGGAAGGAGCTCTCGCTGTTACTT-CAGGTTGAGC
```

*CASP10*<sup>-/-</sup> HT29 clones: 11

```
GATTCTCTTGTAGACCTCCCT-AAGTTTCCTGGCATTCTAGAC
GATTCTCTTGTAGACCTCC-----TGGCATTCTAGAC
GATTCTCTTGTAGACCT-----GGCATTCTAGAC
GATTCTCTTGT-----TTCTGGCATTCTAGAC
GATTCTCTTGTAGACCTCCCTAAGTTTCCTGGCATTCTAGAC
```

*RIPK1*<sup>-/-</sup> *CASP8*<sup>-/-</sup> HT29 clones: 7

*RIPK3*<sup>-/-</sup> *CASP8*<sup>-/-</sup> HT29 clones: 12

*MLKL*<sup>-/-</sup> *CASP8*<sup>-/-</sup> HT29 clones: 13

*RIPK3*<sup>-/-</sup> *CASP10*<sup>-/-</sup> HT29 clones: 10

*MLKL*<sup>-/-</sup> *CASP10*<sup>-/-</sup> HT29 clones: 5

*RIPK3*<sup>-/-</sup> *CASP8*<sup>-/-</sup> *CASP10*<sup>-/-</sup> HT29 clones: 5

*MLKL*<sup>-/-</sup> *CASP8*<sup>-/-</sup> *CASP10*<sup>-/-</sup> HT29 clones: 8

Supplementary figure 5
