# Supplementary material
Source: PubMed Central journal article supplement (PMC5344208)

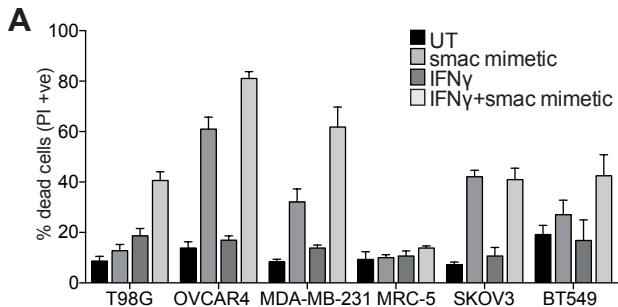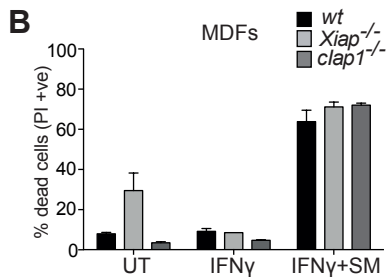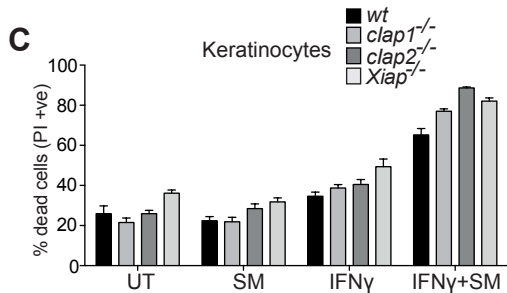

Supplementary Figure 1

Supplement: cdd2016147x1.pdf [file cdd2016147x1.pdf]

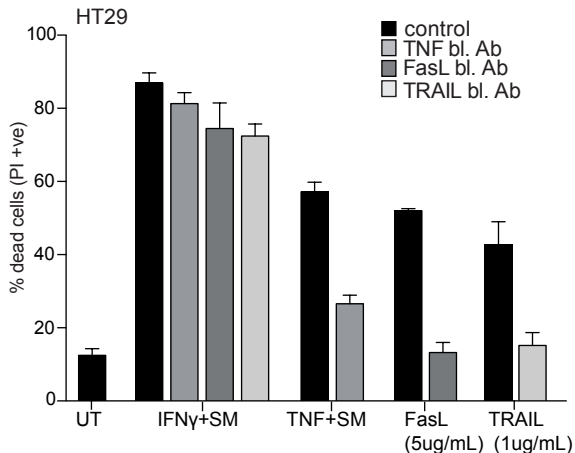

Supplementary Figure 2

Supplement: cdd2016147x2.pdf [file cdd2016147x2.pdf]

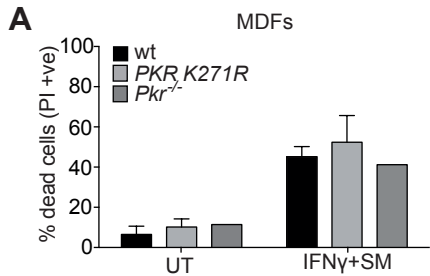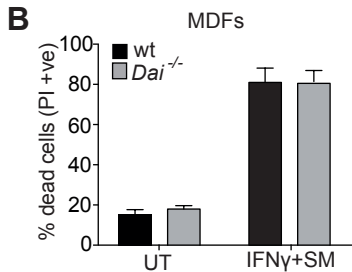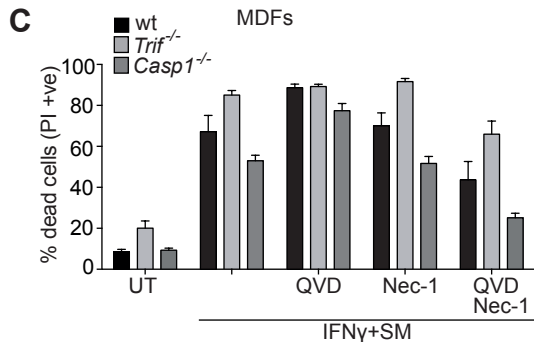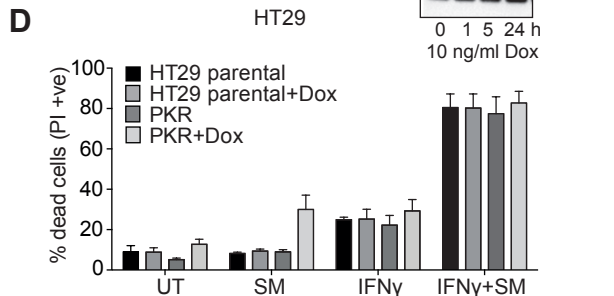

Supplementary Figure 3

Supplement: cdd2016147x3.pdf [file cdd2016147x3.pdf]

**A**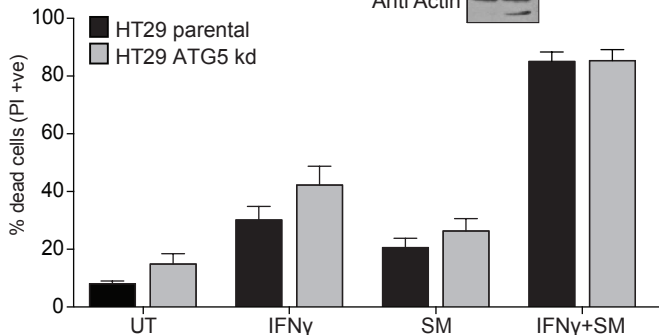**B**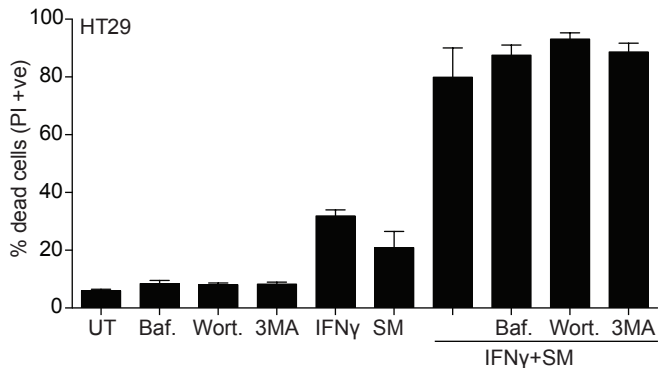**Supplementary Figure 4**

Supplement: cdd2016147x4.pdf [file cdd2016147x4.pdf]

**A**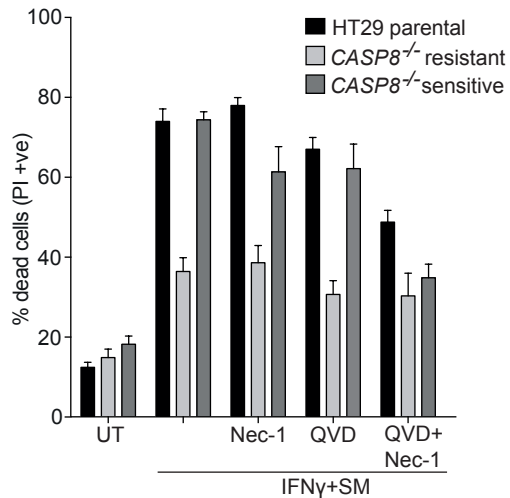**B**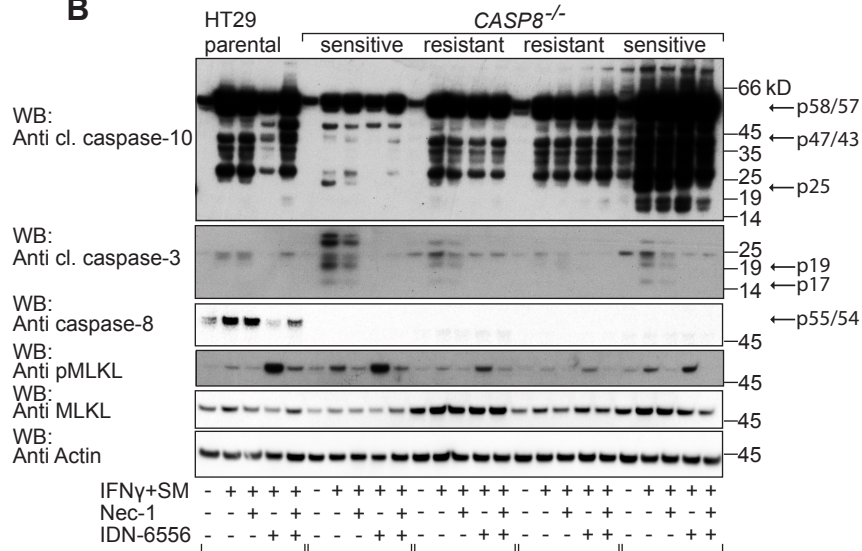

Supplementary Figure 6

Supplement: cdd2016147x6.pdf [file cdd2016147x6.pdf]

**A**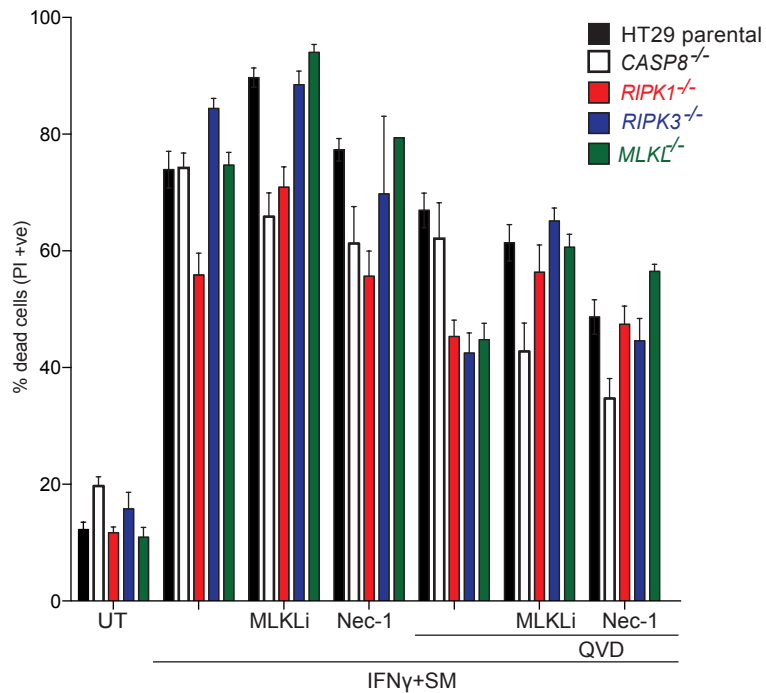**B**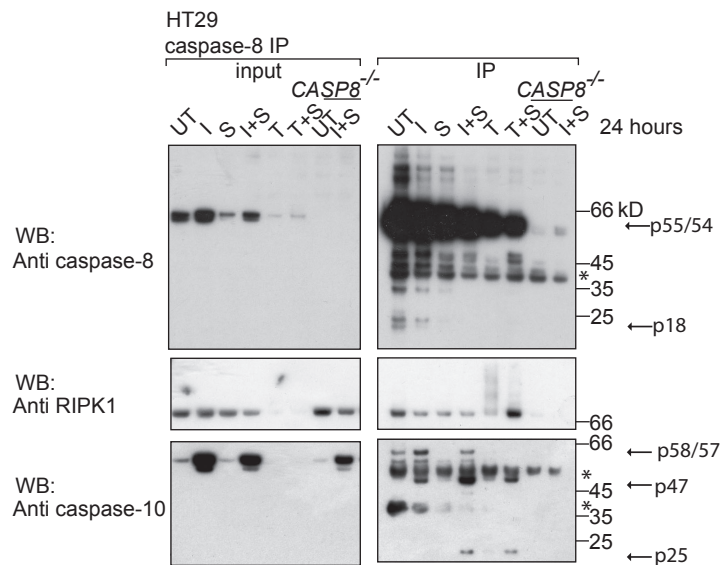**C**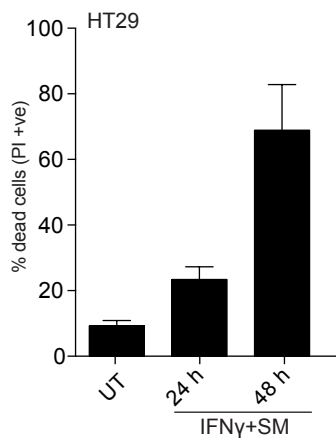

Supplement: cdd2016147x7.pdf [file cdd2016147x7.pdf]

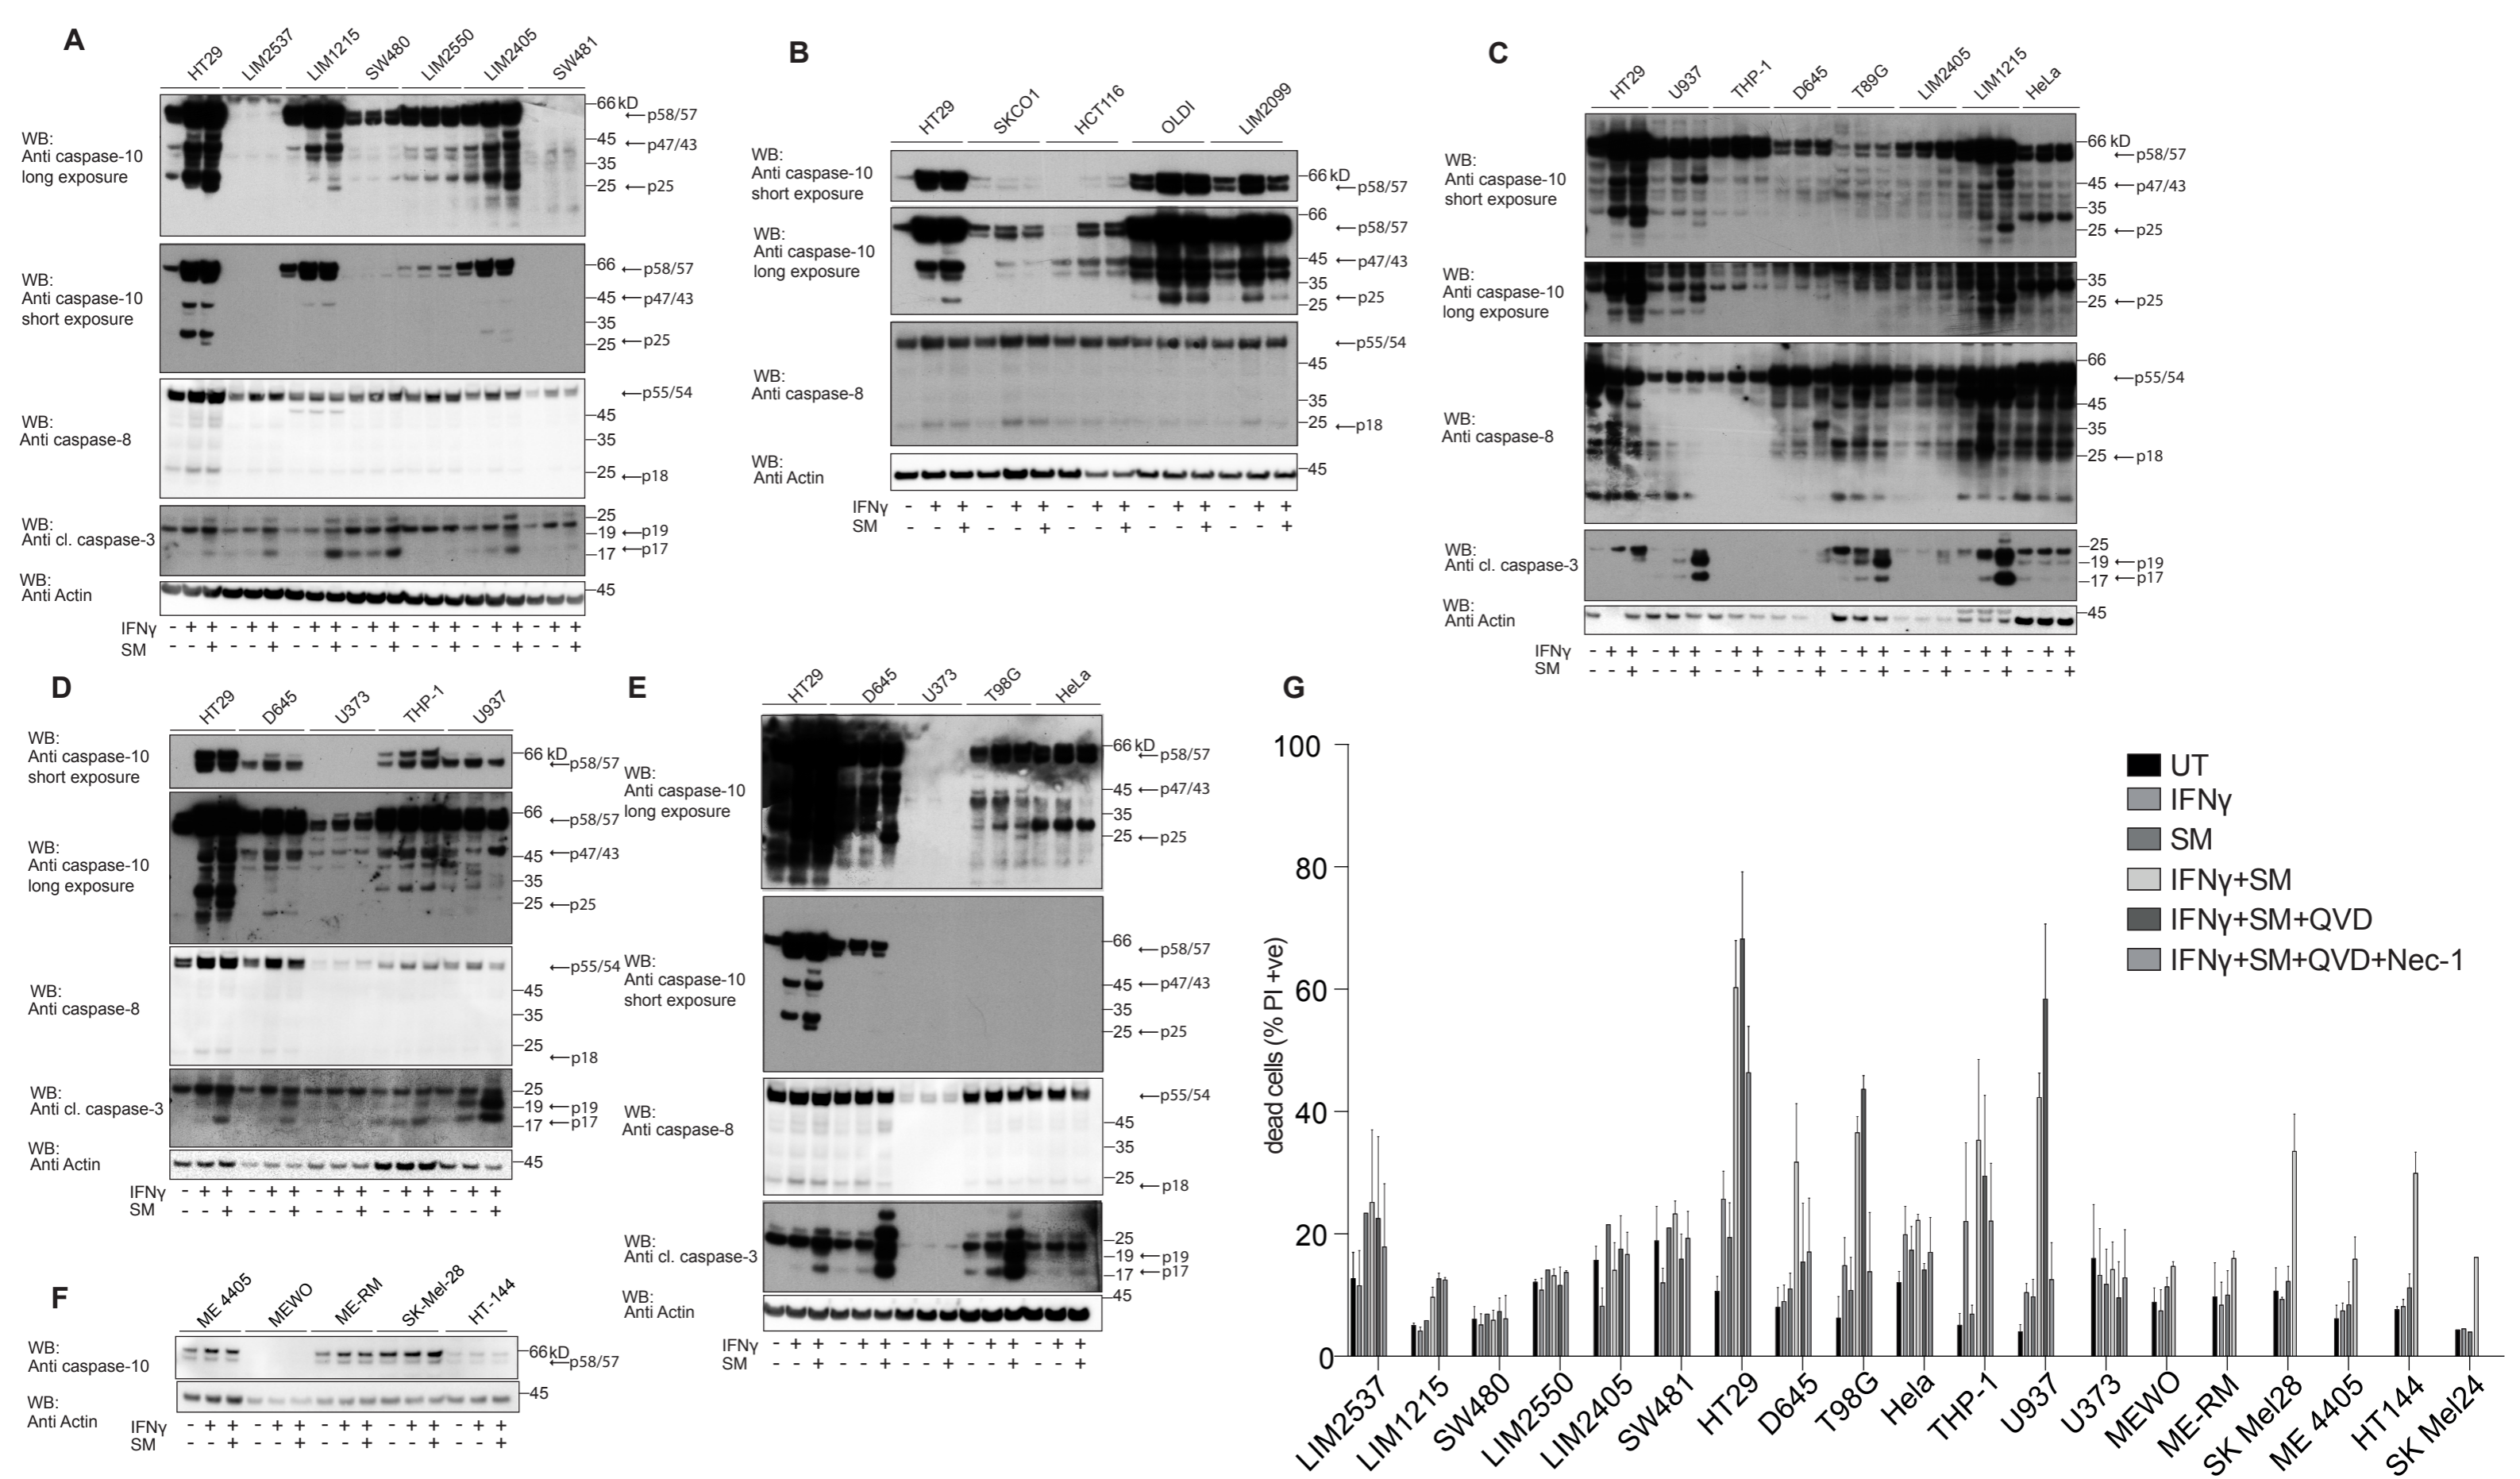

Supplementary Figure 8

Supplement: cdd2016147x8.pdf [file cdd2016147x8.pdf]
